# Supplementary material for: Anion recognition by anthracene appended ortho-aminomethylphenylboronic acid: a new PET-based sensing mechanism
Source: Royal Society of Chemistry journal article supplement (doi:10.1039/d1nj02684d), 2021-01-01
Supplement: d1nj02684d1.pdf [file d1nj02684d1.pdf]

## Anion recognition by anthracene appended *ortho*-aminomethylphenylboronic acid: a new PET based sensing mechanism

Luis Ramón Ortega-Valdovinos, † Josue Valdes-García, ‡ Iván J. Bazany-Rodríguez, ‡ José Carlos Lugo-González, † Alejandro Dorazco-González, ‡ and Anatoly K. Yatsimirsky †  
† Facultad de Química, Universidad Nacional Autónoma de México, 04510 México D.F., México; Email: iatsimirski46@comunidad.unam.mx

‡ Instituto de Química, Universidad Nacional Autónoma de México, Ciudad Universitaria México 04510, CDMX, México;

### Supporting Information

Synthesis of compounds **1** and **2**.

Figure S1. <sup>1</sup>H NMR spectrum of **1** in DMSO-*d*<sub>6</sub>.

Figure S2. <sup>1</sup>H NMR spectrum of **2** in CDCl<sub>3</sub>

Table S1. Crystallographic data for compounds **1**·HBr and **2**

Table S2. Hydrogen bonds for **1**·HBr [Å and °]

Figure S3. <sup>11</sup>B NMR titration of **1** by acetate

Figure S4. The fluorescence titration of **1** by H<sub>2</sub>PO<sub>4</sub><sup>-</sup>

Figure S5. <sup>11</sup>B NMR titration of **1** by dihydrogen phosphate

Figure S6. The fluorescence titration of **1** by F<sup>-</sup>

Figure S7. <sup>1</sup>H and <sup>11</sup>B NMR titrations of **1** by F<sup>-</sup>

Figure S8. <sup>1</sup>H NMR titration profiles of **1** by acetate and dihydrogen phosphate

Figure S9. <sup>1</sup>H NMR titration of **1** by sulfate

Table S3. Stability constants of anion complexes of **1** in MeCN.

Table S4. Energies for calculated structures

Table S5. Cartesian coordinates.

*Synthesis of 2-(((anthracen-9-ylmethyl)(methyl)amino)methyl)phenyl)boronic acid, 1.*

Receptor **1** was prepared by a reported procedure [1]:<sup>1</sup>

9-[(methylamino)methyl]anthracene (120 mg, 0.54 mmol) and 2-(bromomethyl)phenylboronic acid (129 mg, 0.60 mmol) were refluxed in dry acetonitrile (75 mL) for 12 h under an atmosphere of dinitrogen. Solvent was removed under reduced pressure and the resulting yellow solid was washed three times with ethyl acetate (30 mL for each one) at room temperature. The precipitate was neutralized in an aqueous solution of 10 % NaHCO<sub>3</sub> (15 mL) and separated by filtration. The resulting solid was dried under *vacuum* to give **1** as a pale-yellow crystalline powder. Yield: 142 mg, 74 %.

<sup>1</sup>H NMR (300 MHz, 25°C, DMSO-*d*<sub>6</sub>) δ= 9.09 (s, 2H), 8.60 (s, 1H), 8.23-8.20 (d, *J*= 7.9 Hz, 2H), 8.09-8.07 (d, *J*= 7.1 Hz, 2H), 7.83 (d, *J*= 6.9 Hz, 1H), 7.59-7.49 (m, 7H) 4.49 (s, 2H), 3.92 (s, 2H), 2.10 (s, 3H).

[1] T. D. James, K. R. A. S. Sandanayake, R. Iguchi, and S. Shinkai, *J. Am. Chem. Soc.*, 1995, 117 (35), 8982-8987

*Synthesis of 1-(anthracen-9-yl)-N-benzyl-N-methylmethanamine, 2*

9-[(methylamino)methyl]anthracene (50.2 mg, 0.22 mmol), benzyl bromide (42 mg, 0.25 mmol) and Cs<sub>2</sub>CO<sub>3</sub> were combined in dry DMF (5 mL) in a microwave vial under an atmosphere of dinitrogen. The reaction mixture was assisted by microwave twice at 80°C for 15 min with 600 watts and 10 bar. The resulting solution was filtered through celite and solvent was removed under reduced pressure to give **2** as a yellow powder. Yield: 57.4 mg, 82%.

<sup>1</sup>H NMR (300 MHz, 25°C, CDCl<sub>3</sub>) δ= 8.48 (d, *J*= 9.0 Hz, 2H), 8.41 (s, 1H), 8.01 (d, *J*= 9.0 Hz, 2H), 7.54-7.43 (m, 4H), 7.38-7.30 (m, 5H), 4.51 (s, 2H), 3.70 (s, 2H), 2.23 (s, 3H).

MS (EI, *m/z*) calculated for C<sub>23</sub>H<sub>21</sub>N [M]<sup>+</sup> 311, found 311.

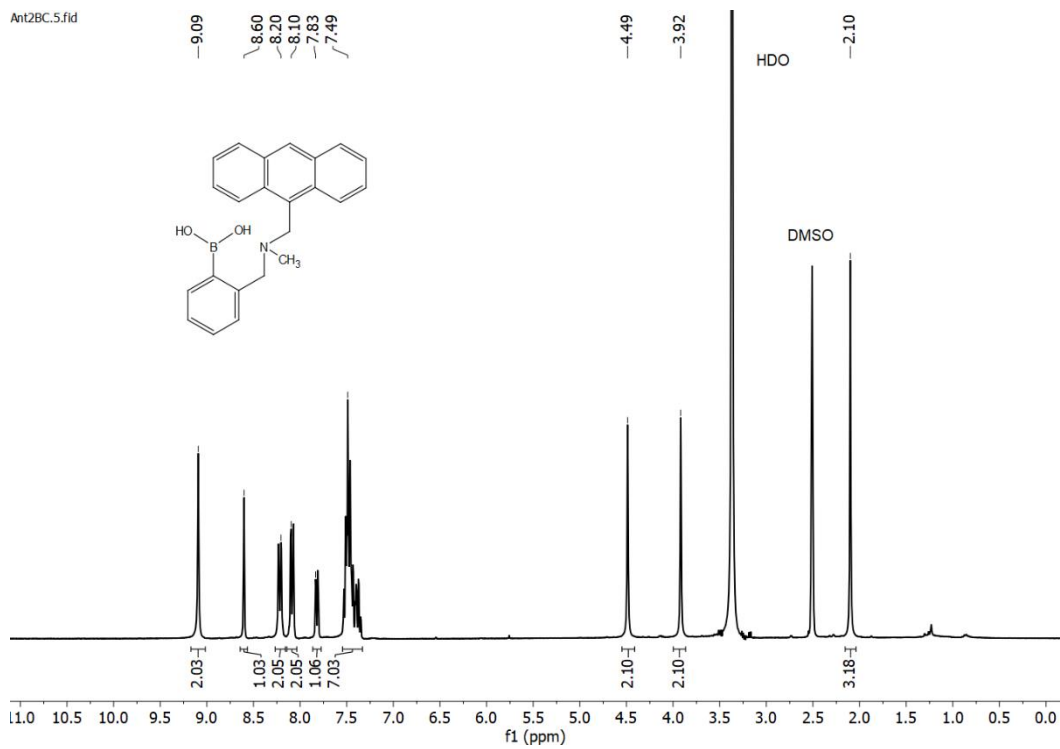

**Figure S1.**  $^1\text{H}$  NMR spectrum of **1** in  $\text{DMSO-}d_6$ .

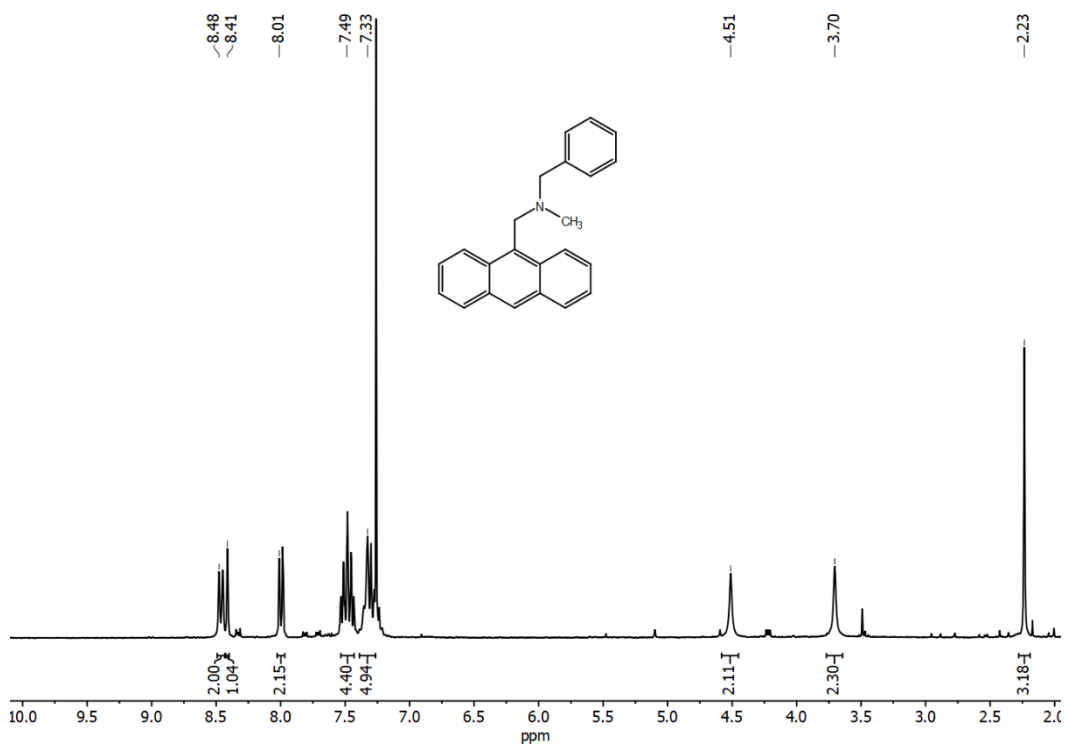

**Figure S2.**  $^1\text{H}$  NMR spectrum of **2** in  $\text{CDCl}_3$ .

**Table S1.** Crystallographic data for compounds **1**·HBr and **2**.

|                                          | <b>1</b> ·HBr                                                                                                     | <b>2</b>                                                                                               |
|------------------------------------------|-------------------------------------------------------------------------------------------------------------------|--------------------------------------------------------------------------------------------------------|
| Empirical formula                        | C <sub>23</sub> H <sub>23</sub> BBrNO <sub>2</sub>                                                                | C <sub>23</sub> H <sub>21</sub> N                                                                      |
| Formula weight                           | 436.14                                                                                                            | 311.41                                                                                                 |
| Temperature                              | 100(2) K                                                                                                          | 100(2) K                                                                                               |
| Wavelength                               | 0.71073 Å                                                                                                         | 1.54178 Å                                                                                              |
| Crystal system                           | Triclinic                                                                                                         | Monoclinic                                                                                             |
| Space group                              | P-1                                                                                                               | P2 <sub>1</sub>                                                                                        |
| Unit cell dimensions                     | a = 8.2825(4) Å<br>b = 9.9237(5) Å<br>c = 13.9515(6) Å<br>α = 107.3957(8)°<br>β = 93.2715(9)°<br>γ = 112.7526(8)° | a = 11.90321(13) Å<br>b = 6.32633(7) Å<br>c = 12.08122(13) Å<br>α = 90°<br>β = 110.4706(3)°<br>γ = 90° |
| Volume                                   | 989.49(8) Å <sup>3</sup>                                                                                          | 852.310(16) Å <sup>3</sup>                                                                             |
| Z                                        | 2                                                                                                                 | 2                                                                                                      |
| P <sub>calcd</sub> (g cm <sup>-3</sup> ) | 1.464                                                                                                             | 1.213                                                                                                  |
| μ (mm <sup>-1</sup> )                    | 2.096                                                                                                             | 0.529                                                                                                  |
| Theta range for data collection          | 2.343 to 27.441°                                                                                                  | 3.964 to 71.546°                                                                                       |
| Index ranges                             | -10 ≤ h ≤ 10, -12 ≤ k ≤ 12,<br>-18 ≤ l ≤ 18                                                                       | -14 ≤ h ≤ 14, -6 ≤ k ≤ 7,<br>-14 ≤ l ≤ 14                                                              |
| Reflections collected                    | 19093                                                                                                             | 13723                                                                                                  |
| Independent reflections                  | 4525 [R(int) = 0.0224]                                                                                            | 2972 [R(int) = 0.0252]                                                                                 |
| Data / restraints / parameters           | 4525 / 3 / 263                                                                                                    | 2972 / 1 / 218                                                                                         |
| Goodness-of-fit on F <sup>2</sup>        | 1.131                                                                                                             | 1.057                                                                                                  |
| Final R indices [I > 2σ(I)]              | R1 = 0.0322, wR2 = 0.0784                                                                                         | R1 = 0.0279, wR2 = 0.0765                                                                              |
| R indices (all data)                     | R1 = 0.0345, wR2 = 0.0794                                                                                         | R1 = 0.0280, wR2 = 0.0766                                                                              |
| Largest diff. peak and hole              | 0.744 and -0.478 e.Å <sup>-3</sup>                                                                                | 0.153 and -0.155 e.Å <sup>-3</sup>                                                                     |

**Table S2.** Hydrogen bonds for **1**·HBr [Å and °].

| D-H...A              | d(D-H)    | d(H...A)  | d(D...A)   | <(DHA) |
|----------------------|-----------|-----------|------------|--------|
| O(1)-H(1O)...Br(1)   | 0.831(10) | 2.377(13) | 3.1837(15) | 164(3) |
| O(2)-H(2O)...Br(1)#1 | 0.843(10) | 2.438(14) | 3.2499(16) | 162(3) |
| N(1)-H(1N)...O(1)    | 0.891(10) | 1.974(19) | 2.705(2)   | 138(2) |

Symmetry transformations used to generate equivalent atoms:

#1 -x+2,-y+2,-z+2

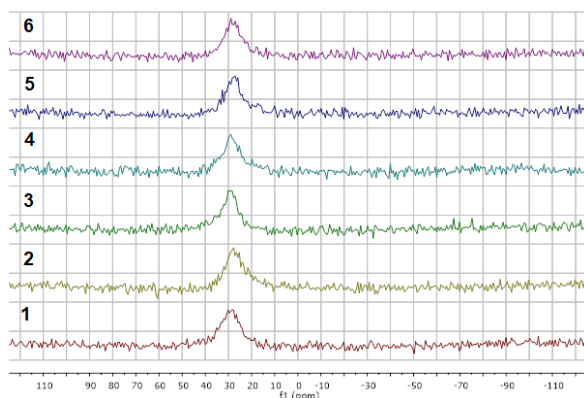

**Figure S3.**  $^{11}\text{B}$  NMR titration of 11.2 mM **1** in  $\text{DMSO-d}_6$  by acetate. Spectra 1 to 6 are recorded in the presence of 0, 5, 10, 19, 27 and 35 mM  $(\text{Bu}_4\text{N})\text{OAc}$ .

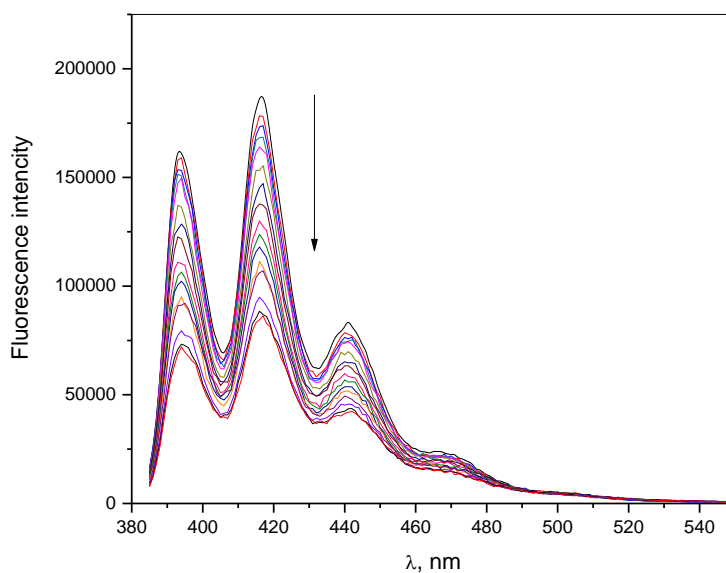

**Figure S4.** The course of the fluorescence titration of 10  $\mu\text{M}$  **1** in  $\text{DMSO}$  by 0.2 – 80 mM  $\text{H}_2\text{PO}_4^-$ , excitation wavelength 370nm

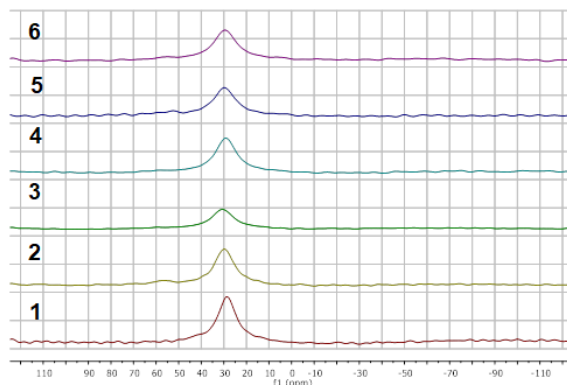

**Figure S5.**  $^{11}\text{B}$  NMR titration of 19.3 mM **1** in  $\text{DMSO-d}_6$  by dihydrogen phosphate. Spectra 1 to 6 are recorded in the presence of 0, 10.9, 21.1, 40.3, 57.5 and 73.1 mM  $(\text{Bu}_4\text{N})\text{H}_2\text{PO}_4$ .

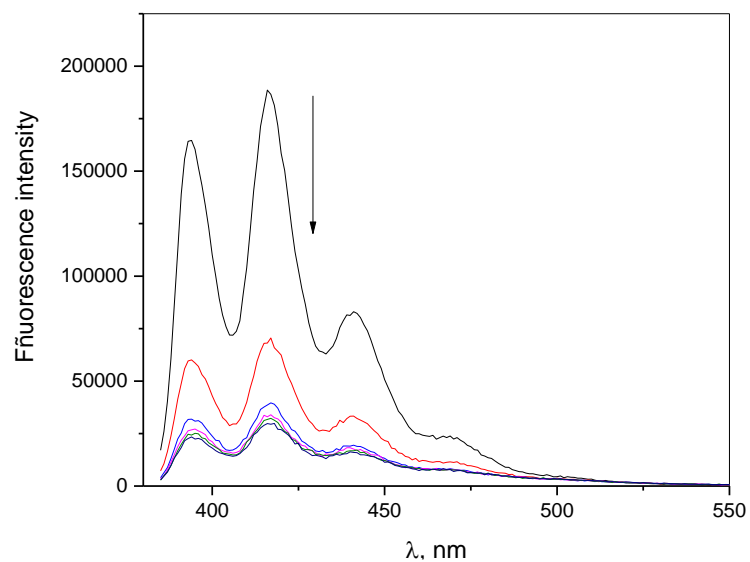

**Figure S6.** The course of the fluorescence titration of 10  $\mu\text{M}$  **1** in DMSO by 0.25 – 1.2 mM  $\text{F}^-$ , excitation wavelength 370nm.

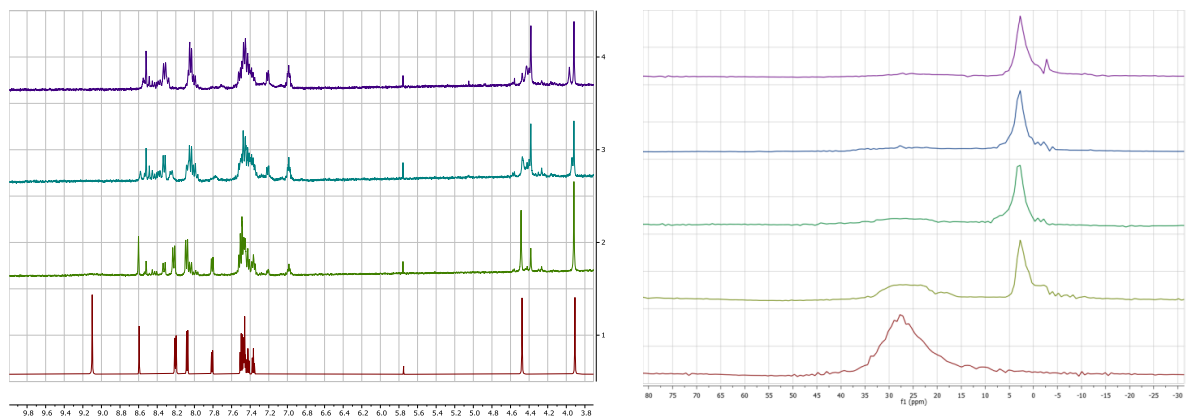

**Figure S7.**  $^1\text{H}$  and  $^{11}\text{B}$  NMR titration of 1.3 mM and 17.7 mM **1** respectively by  $(\text{Bu}_4\text{N})_2\text{F}$  in DMSO- $\text{d}_6$ . Spectra from bottom to top contain 0, 0.7; 1.3 and 2 mM of  $(\text{Bu}_4\text{N})_2\text{F}$  in  $^1\text{H}$  titration and 0, 8, 15.5, 30, 44 and 57 mM of  $(\text{Bu}_4\text{N})_2\text{F}$  in  $^{11}\text{B}$  titration.

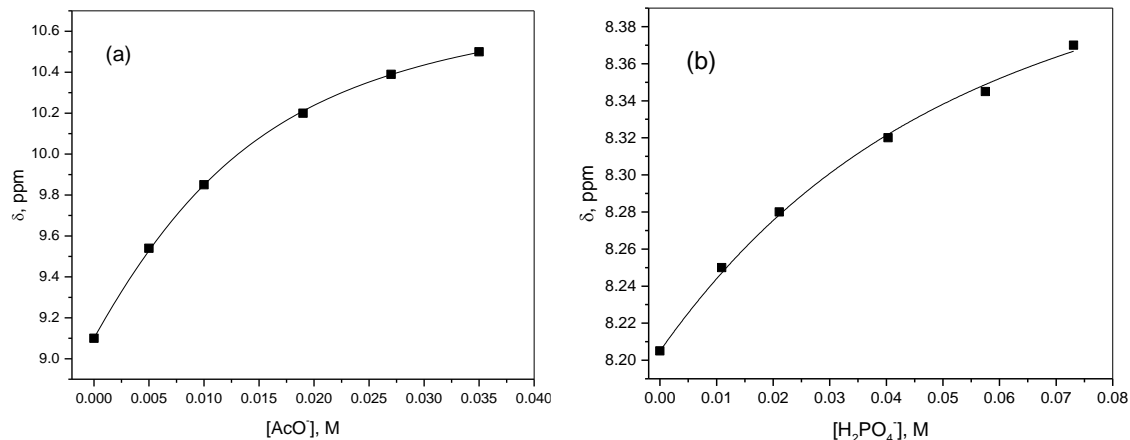

**Figure S8.** <sup>1</sup>H NMR titration profiles of (a) 11.2 mM **1** by acetate and (b) 19.3 mM **1** by dihydrogen phosphate in DMSO-d<sub>6</sub>; shifts of B-OH protons for acetate and of aromatic protons for dihydrogen phosphate.

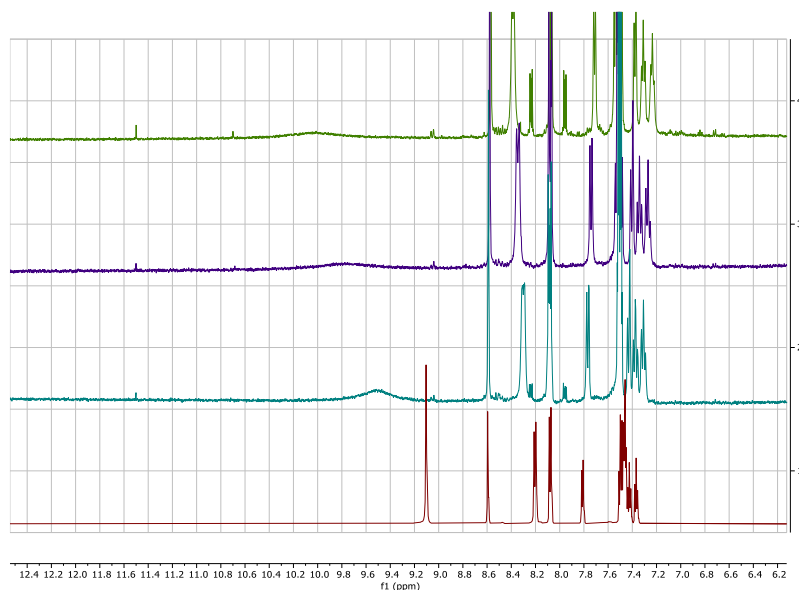

**Figure S9.** <sup>1</sup>H NMR titration of 3 mM **1** by (Bu<sub>4</sub>N)<sub>2</sub>SO<sub>4</sub>. Spectra from bottom to top contain 0; 1.5; 3.0 and 4.5 mM of (Bu<sub>4</sub>N)<sub>2</sub>SO<sub>4</sub>.

**Table S3.** Results of the fluorescence titrations of 0.01 mM **1** in MeCN.

| Anion                                       | $K_A, M^{-1}$     | $I_C/I_0$ |
|---------------------------------------------|-------------------|-----------|
| AcO <sup>-</sup>                            | 470               | 0.12      |
| H <sub>2</sub> PO <sub>4</sub> <sup>-</sup> | 74                | 0.25      |
| BzO <sup>-</sup>                            | 154               | 0.39      |
| F <sup>-</sup>                              | $3.3 \times 10^4$ | 0.07      |
| HSO <sub>4</sub> <sup>-</sup>               | $3.1 \times 10^3$ | 2.27      |

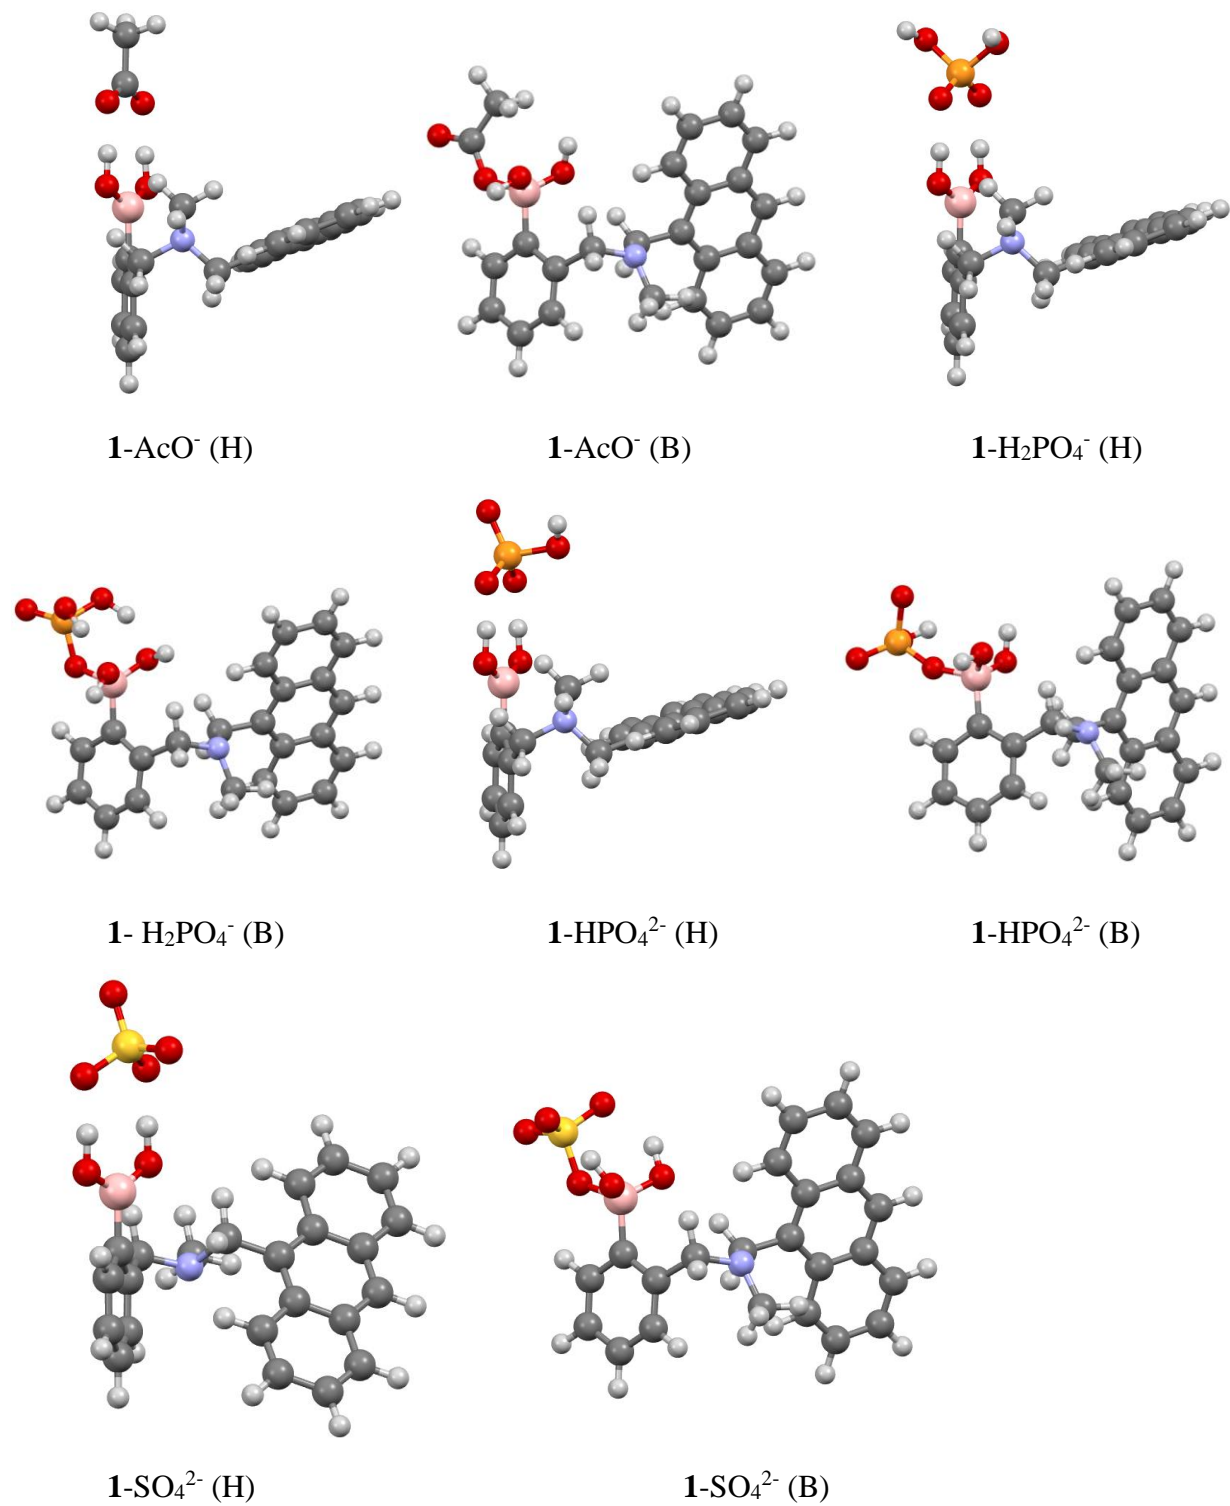

**Fig. S10.** Calculated structures of H-bound (H) or B-bound (B) anion complexes of **1**.



**Table S4.** Sum of electronic and thermal free energies, Hartree Eh (1 Eh = 627.509 kcal/mol) and the number of imaginary frequencies for calculated structures shown in Fig. S10.

| Anion                                       | Binding type | Energy       | Number of imaginary frequencies |
|---------------------------------------------|--------------|--------------|---------------------------------|
| AcO <sup>-</sup>                            | B            | -1348.08936  | 0                               |
|                                             | H            | -1348.11046  | 0                               |
| H <sub>2</sub> PO <sub>4</sub> <sup>-</sup> | B            | -1763.27041  | 0                               |
|                                             | H            | -1763.27913  | 0                               |
| HPO <sub>4</sub> <sup>2-</sup>              | B            | -1762.792521 | 0                               |
|                                             | H            | -1762.795419 | 0                               |
| SO <sub>4</sub> <sup>2-</sup>               | B            | -1818.91203  | 0                               |
|                                             | H            | -1818.920523 | 0                               |

**Table S5.** Cartesian coordinates.

Complex 1-AcO<sup>-</sup> (H):

| Atom | X        | Y        | Z        |
|------|----------|----------|----------|
| C    | -2.50730 | 1.71428  | -0.31360 |
| C    | -1.62313 | 2.25600  | -1.26361 |
| C    | -1.35567 | 3.62127  | -1.26827 |
| H    | -0.66169 | 4.02208  | -1.99973 |
| C    | -1.95240 | 4.47248  | -0.34367 |
| H    | -1.73235 | 5.53307  | -0.36118 |
| C    | -2.81827 | 3.95063  | 0.60548  |
| H    | -3.28360 | 4.60134  | 1.33616  |
| C    | -3.08234 | 2.58427  | 0.61514  |
| H    | -3.75333 | 2.18013  | 1.36520  |
| C    | -0.90592 | 1.34491  | -2.23023 |
| H    | -1.63351 | 0.71311  | -2.73584 |
| H    | -0.38264 | 1.94179  | -2.99331 |
| C    | 0.32343  | -0.71178 | -2.34072 |
| H    | 0.77167  | -0.44728 | -3.31205 |
| H    | -0.60267 | -1.25853 | -2.52092 |
| H    | 1.01559  | -1.37016 | -1.81410 |
| C    | 1.25179  | 1.19382  | -1.18689 |
| H    | 0.95391  | 2.14795  | -0.74989 |
| H    | 1.81212  | 1.44639  | -2.09536 |
| C    | 2.12556  | 0.46240  | -0.19398 |
| C    | 1.75345  | 0.46689  | 1.16502  |
| C    | 0.56822  | 1.12011  | 1.63471  |
| H    | -0.08609 | 1.61320  | 0.92874  |
| C    | 0.23531  | 1.11728  | 2.95357  |
| H    | -0.66995 | 1.61540  | 3.27940  |
| C    | 1.05622  | 0.46167  | 3.91360  |

|   |          |          |          |
|---|----------|----------|----------|
| H | 0.77120  | 0.47219  | 4.95810  |
| C | 2.18810  | -0.17302 | 3.51403  |
| H | 2.82658  | -0.67890 | 4.22917  |
| C | 2.57153  | -0.19347 | 2.13772  |
| C | 3.73242  | -0.84215 | 1.73080  |
| H | 4.35223  | -1.34022 | 2.46870  |
| C | 4.11022  | -0.86609 | 0.39431  |
| C | 5.30082  | -1.54684 | -0.00980 |
| H | 5.89487  | -2.03051 | 0.75709  |
| C | 5.67357  | -1.59054 | -1.31350 |
| H | 6.57543  | -2.11004 | -1.61186 |
| C | 4.86958  | -0.95159 | -2.29956 |
| H | 5.16931  | -0.99788 | -3.33918 |
| C | 3.73375  | -0.28909 | -1.95490 |
| H | 3.14761  | 0.17543  | -2.73412 |
| C | 3.29762  | -0.20783 | -0.59063 |
| N | 0.03108  | 0.46005  | -1.53200 |
| O | -3.08087 | -0.53321 | -1.38257 |
| O | -3.07197 | -0.35136 | 1.00758  |
| B | -2.88612 | 0.16882  | -0.23469 |
| H | -3.33228 | -1.49445 | -1.24497 |
| H | -3.35024 | -1.31379 | 1.01998  |
| H | -4.82552 | -5.20449 | 1.04164  |
| C | -4.21458 | -5.00525 | 0.16276  |
| H | -4.71106 | -5.37019 | -0.73452 |
| C | -3.89552 | -3.52406 | 0.04797  |
| O | -3.79539 | -2.87463 | 1.11713  |
| O | -3.72653 | -3.05915 | -1.10593 |
| H | -3.27323 | -5.54900 | 0.27614  |

### Complex 1-AcO<sup>-</sup> (B):

| Atom | X        | Y        | Z        |
|------|----------|----------|----------|
| C    | 2.83776  | -1.10526 | -0.17384 |
| C    | 1.92571  | -1.63202 | -1.11437 |
| C    | 1.82939  | -3.01320 | -1.30645 |
| H    | 1.17285  | -3.39685 | -2.07905 |
| C    | 2.57189  | -3.90581 | -0.54520 |
| H    | 2.48038  | -4.97286 | -0.71024 |
| C    | 3.43684  | -3.40912 | 0.41889  |
| H    | 4.02333  | -4.08731 | 1.02831  |
| C    | 3.56868  | -2.03398 | 0.57952  |
| H    | 4.27706  | -1.66082 | 1.30854  |
| C    | 1.01409  | -0.73592 | -1.93760 |
| H    | 1.34747  | 0.29490  | -1.83468 |
| H    | 1.08838  | -1.00836 | -2.99392 |
| C    | -1.12984 | -1.95213 | -2.06280 |
| H    | -0.90323 | -2.86351 | -1.49041 |
| H    | -0.89195 | -2.13415 | -3.11212 |
| H    | -2.20570 | -1.77704 | -1.98401 |

|   |          |          |          |
|---|----------|----------|----------|
| C | -0.66241 | -0.53859 | -0.17178 |
| H | 0.08411  | 0.17348  | 0.17981  |
| H | -0.50848 | -1.45141 | 0.41481  |
| C | -2.04467 | 0.02767  | 0.06766  |
| C | -2.27850 | 1.37581  | -0.26868 |
| C | -1.25921 | 2.20856  | -0.83524 |
| H | -0.27649 | 1.79445  | -1.01620 |
| C | -1.50602 | 3.50864  | -1.15044 |
| H | -0.71923 | 4.11850  | -1.57722 |
| C | -2.78887 | 4.08382  | -0.92677 |
| H | -2.96204 | 5.12104  | -1.18505 |
| C | -3.78459 | 3.33173  | -0.39130 |
| H | -4.76737 | 3.75280  | -0.21257 |
| C | -3.56596 | 1.96185  | -0.04843 |
| C | -4.58614 | 1.18976  | 0.49835  |
| H | -5.56064 | 1.63511  | 0.66818  |
| C | -4.37894 | -0.14449 | 0.82456  |
| C | -5.44058 | -0.93128 | 1.37141  |
| H | -6.39872 | -0.45062 | 1.53290  |
| C | -5.25653 | -2.24073 | 1.67476  |
| H | -6.06626 | -2.82988 | 2.08658  |
| C | -3.98946 | -2.84866 | 1.44505  |
| H | -3.85416 | -3.89703 | 1.68053  |
| C | -2.95278 | -2.13317 | 0.93415  |
| H | -2.00887 | -2.63162 | 0.76797  |
| C | -3.09154 | -0.74380 | 0.60355  |
| N | -0.41438 | -0.78066 | -1.59256 |
| O | 3.61214  | 1.07902  | -1.31801 |
| O | 1.97974  | 1.25502  | 0.39002  |
| B | 3.14408  | 0.51050  | -0.05316 |
| H | 4.34428  | 0.56658  | -1.67089 |
| H | 2.02721  | 2.15726  | 0.05966  |
| H | 3.39169  | 3.22824  | 1.58336  |
| O | 5.76526  | 1.59390  | 2.26819  |
| C | 4.84377  | 1.67407  | 1.47197  |
| C | 4.32270  | 3.02866  | 1.04943  |
| O | 4.27902  | 0.60334  | 0.98888  |
| H | 4.11864  | 3.05558  | -0.01931 |
| H | 5.05013  | 3.79091  | 1.31774  |

**Complex 1-H<sub>2</sub>PO<sub>4</sub><sup>-</sup> (H):**

| Atom | X        | Y       | Z        |
|------|----------|---------|----------|
| C    | -1.66481 | 2.48449 | -0.32873 |
| C    | -0.68402 | 2.80715 | -1.28354 |
| C    | -0.11524 | 4.07658 | -1.29642 |
| H    | 0.65042  | 4.30582 | -2.03011 |
| C    | -0.50395 | 5.04612 | -0.37743 |
| H    | -0.05051 | 6.02967 | -0.40158 |
| C    | -1.46449 | 4.73929 | 0.57432  |

|   |          |          |          |
|---|----------|----------|----------|
| H | -1.77113 | 5.48295  | 1.30002  |
| C | -2.02875 | 3.46719  | 0.59393  |
| H | -2.77227 | 3.22991  | 1.34690  |
| C | -0.19573 | 1.75232  | -2.24692 |
| H | -1.04847 | 1.31165  | -2.75959 |
| H | 0.45869  | 2.20823  | -3.00576 |
| C | 0.49716  | -0.54381 | -2.34098 |
| H | 0.99180  | -0.40456 | -3.31569 |
| H | -0.53414 | -0.85316 | -2.51368 |
| H | 1.01192  | -1.34477 | -1.80877 |
| C | 1.86314  | 1.09048  | -1.20496 |
| H | 1.80670  | 2.09340  | -0.77926 |
| H | 2.46663  | 1.18901  | -2.11551 |
| C | 2.53665  | 0.18008  | -0.20446 |
| C | 2.18936  | 0.29654  | 1.15610  |
| C | 1.20361  | 1.22622  | 1.62061  |
| H | 0.68214  | 1.85279  | 0.90993  |
| C | 0.89270  | 1.32485  | 2.94120  |
| H | 0.13887  | 2.03315  | 3.26343  |
| C | 1.53862  | 0.50435  | 3.90806  |
| H | 1.27492  | 0.60065  | 4.95380  |
| C | 2.47748  | -0.39364 | 3.51344  |
| H | 2.97986  | -1.02883 | 4.23395  |
| C | 2.83060  | -0.52879 | 2.13557  |
| C | 3.79331  | -1.44831 | 1.73340  |
| H | 4.27999  | -2.07089 | 2.47654  |
| C | 4.13954  | -1.58631 | 0.39522  |
| C | 5.12190  | -2.54556 | -0.00371 |
| H | 5.58771  | -3.14751 | 0.76805  |
| C | 5.45778  | -2.70153 | -1.30881 |
| H | 6.20085  | -3.43174 | -1.60352 |
| C | 4.82424  | -1.90134 | -2.30146 |
| H | 5.09106  | -2.03811 | -3.34211 |
| C | 3.89046  | -0.97355 | -1.96209 |
| H | 3.42699  | -0.39355 | -2.74676 |
| C | 3.50322  | -0.76455 | -0.59648 |
| N | 0.49999  | 0.67136  | -1.54290 |
| O | -2.74902 | 0.44259  | -1.39159 |
| O | -2.64417 | 0.60133  | 1.01032  |
| B | -2.37843 | 1.06451  | -0.23977 |
| H | -3.18901 | -0.44015 | -1.30292 |
| H | -3.14461 | -0.25051 | 1.08195  |
| H | -6.20179 | -3.03510 | -0.76036 |
| O | -5.88286 | -2.76966 | 0.11150  |
| P | -4.30023 | -2.46997 | 0.09318  |
| O | -4.00008 | -1.67106 | 1.31052  |
| O | -3.91750 | -1.95257 | -1.25710 |
| O | -3.63304 | -3.92318 | 0.29311  |
| H | -3.44408 | -4.34012 | -0.55678 |

Complex 1-H<sub>2</sub>PO<sub>4</sub><sup>-</sup> (B):

| Atom | X        | Y        | Z        |
|------|----------|----------|----------|
| C    | -2.34077 | 1.49995  | -0.35003 |
| C    | -1.34308 | 1.92392  | -1.25257 |
| C    | -1.08729 | 3.28794  | -1.42199 |
| H    | -0.36706 | 3.60321  | -2.16771 |
| C    | -1.74976 | 4.24985  | -0.67315 |
| H    | -1.53281 | 5.30097  | -0.82116 |
| C    | -2.69783 | 3.84668  | 0.25605  |
| H    | -3.22424 | 4.58108  | 0.85452  |
| C    | -2.99037 | 2.49540  | 0.39217  |
| H    | -3.76114 | 2.19704  | 1.09170  |
| C    | -0.50114 | 0.94769  | -2.06066 |
| H    | -0.94005 | -0.04895 | -2.00668 |
| H    | -0.50903 | 1.24550  | -3.11216 |
| C    | 1.75562  | 1.94124  | -2.06341 |
| H    | 1.60361  | 2.84650  | -1.45865 |
| H    | 1.57170  | 2.18864  | -3.10994 |
| H    | 2.80391  | 1.65118  | -1.96151 |
| C    | 1.07495  | 0.50991  | -0.25175 |
| H    | 0.29267  | -0.19500 | 0.03005  |
| H    | 0.91153  | 1.39295  | 0.37557  |
| C    | 2.42297  | -0.11224 | 0.03842  |
| C    | 2.65068  | -1.43876 | -0.37685 |
| C    | 1.67051  | -2.19459 | -1.09821 |
| H    | 0.73476  | -1.72610 | -1.37042 |
| C    | 1.90643  | -3.47971 | -1.47603 |
| H    | 1.14946  | -4.02830 | -2.02278 |
| C    | 3.14170  | -4.11611 | -1.16751 |
| H    | 3.30720  | -5.14036 | -1.47717 |
| C    | 4.10371  | -3.43549 | -0.49316 |
| H    | 5.05213  | -3.90186 | -0.25230 |
| C    | 3.89441  | -2.08340 | -0.08106 |
| C    | 4.88163  | -1.38528 | 0.60671  |
| H    | 5.82232  | -1.87551 | 0.83375  |
| C    | 4.68526  | -0.06807 | 1.00174  |
| C    | 5.71690  | 0.64351  | 1.69005  |
| H    | 6.64209  | 0.11949  | 1.90103  |
| C    | 5.54556  | 1.93649  | 2.06339  |
| H    | 6.33255  | 2.46910  | 2.58230  |
| C    | 4.32243  | 2.60177  | 1.76599  |
| H    | 4.19800  | 3.63732  | 2.05745  |
| C    | 3.31331  | 1.95714  | 1.12241  |
| H    | 2.40388  | 2.49980  | 0.90937  |
| C    | 3.43972  | 0.58789  | 0.71275  |
| N    | 0.90833  | 0.83064  | -1.66721 |
| O    | -3.35834 | -0.55712 | -1.52938 |
| O    | -1.88558 | -1.04297 | 0.25925  |
| B    | -2.86042 | -0.04623 | -0.23072 |

|   |          |          |          |
|---|----------|----------|----------|
| H | -3.68670 | 0.15514  | -2.08642 |
| H | -1.51229 | -1.52671 | -0.48486 |
| O | -3.99954 | -0.05842 | 0.77636  |
| H | -4.57971 | -1.63613 | -0.93030 |
| O | -5.14321 | -2.03140 | -0.22052 |
| P | -4.75358 | -1.36142 | 1.16751  |
| O | -5.91097 | -1.20835 | 2.05367  |
| O | -3.64786 | -2.30007 | 1.81812  |
| H | -2.79453 | -2.07905 | 1.37787  |

**Complex 1-HPO<sub>4</sub><sup>2-</sup> (H):**

| Atom | X        | Y        | Z        |
|------|----------|----------|----------|
| C    | -1.88867 | 2.37046  | -0.32783 |
| C    | -0.91255 | 2.71890  | -1.27962 |
| C    | -0.38208 | 4.00546  | -1.30145 |
| H    | 0.37850  | 4.25224  | -2.03523 |
| C    | -0.80307 | 4.97119  | -0.39261 |
| H    | -0.38031 | 5.96824  | -0.42347 |
| C    | -1.75834 | 4.64151  | 0.55728  |
| H    | -2.09116 | 5.38136  | 1.27574  |
| C    | -2.28360 | 3.35240  | 0.58349  |
| H    | -3.02230 | 3.09684  | 1.33556  |
| C    | -0.38726 | 1.67306  | -2.23359 |
| H    | -1.22821 | 1.17575  | -2.71193 |
| H    | 0.22667  | 2.14730  | -3.01555 |
| C    | 0.42550  | -0.58518 | -2.29826 |
| H    | 0.88913  | -0.44136 | -3.28794 |
| H    | -0.59178 | -0.95263 | -2.43718 |
| H    | 0.99597  | -1.34539 | -1.76246 |
| C    | 1.72450  | 1.14014  | -1.22082 |
| H    | 1.62233  | 2.14544  | -0.80859 |
| H    | 2.30764  | 1.25537  | -2.14287 |
| C    | 2.45988  | 0.28364  | -0.21620 |
| C    | 2.10505  | 0.38601  | 1.14326  |
| C    | 1.05486  | 1.24709  | 1.59782  |
| H    | 0.49124  | 1.82737  | 0.88007  |
| C    | 0.73290  | 1.33184  | 2.91661  |
| H    | -0.07152 | 1.98563  | 3.23172  |
| C    | 1.43305  | 0.56631  | 3.89094  |
| H    | 1.15918  | 0.65001  | 4.93517  |
| C    | 2.43539  | -0.26471 | 3.50554  |
| H    | 2.97932  | -0.85731 | 4.23217  |
| C    | 2.80099  | -0.38461 | 2.12947  |
| C    | 3.82665  | -1.23690 | 1.73488  |
| H    | 4.35622  | -1.81708 | 2.48303  |
| C    | 4.18054  | -1.36259 | 0.39740  |
| C    | 5.22731  | -2.25422 | 0.00543  |
| H    | 5.73663  | -2.81308 | 0.78215  |
| C    | 5.56955  | -2.40099 | -1.29914 |

|   |          |          |          |
|---|----------|----------|----------|
| H | 6.36172  | -3.08012 | -1.58807 |
| C | 4.87699  | -1.66053 | -2.29871 |
| H | 5.14805  | -1.79208 | -3.33893 |
| C | 3.88181  | -0.79622 | -1.96603 |
| H | 3.37422  | -0.26056 | -2.75494 |
| C | 3.48685  | -0.59745 | -0.60123 |
| N | 0.38097  | 0.64495  | -1.52603 |
| O | -2.89028 | 0.27906  | -1.38103 |
| O | -2.83751 | 0.46996  | 1.01797  |
| B | -2.56886 | 0.92033  | -0.23246 |
| H | -3.30626 | -0.67056 | -1.29125 |
| H | -3.33895 | -0.43275 | 1.07149  |
| O | -5.28054 | -3.66853 | 0.07211  |
| P | -4.12250 | -2.71144 | 0.07357  |
| O | -4.09047 | -1.70990 | 1.22267  |
| O | -3.87884 | -2.02646 | -1.27411 |
| O | -2.76920 | -3.63080 | 0.35610  |
| H | -2.84416 | -4.44150 | -0.15716 |

**Complex 1-HPO<sub>4</sub><sup>2-</sup> (B):**

| Atom | X        | Y        | Z        |
|------|----------|----------|----------|
| C    | -2.34742 | 1.54770  | -0.31876 |
| C    | -1.34212 | 2.01525  | -1.19060 |
| C    | -1.08201 | 3.38494  | -1.30036 |
| H    | -0.35460 | 3.73185  | -2.02562 |
| C    | -1.75112 | 4.31561  | -0.51640 |
| H    | -1.53260 | 5.37237  | -0.61587 |
| C    | -2.70840 | 3.87076  | 0.38472  |
| H    | -3.24027 | 4.57946  | 1.00983  |
| C    | -3.00091 | 2.51313  | 0.45877  |
| H    | -3.77911 | 2.17740  | 1.13410  |
| C    | -0.50595 | 1.06219  | -2.02933 |
| H    | -0.95920 | 0.07235  | -1.99144 |
| H    | -0.51349 | 1.38618  | -3.07369 |
| C    | 1.76452  | 2.03011  | -2.03442 |
| H    | 1.62338  | 2.93354  | -1.42351 |
| H    | 1.58294  | 2.28710  | -3.07926 |
| H    | 2.81070  | 1.72972  | -1.93561 |
| C    | 1.07552  | 0.59691  | -0.22987 |
| H    | 0.25377  | -0.05773 | 0.06380  |
| H    | 0.97721  | 1.49076  | 0.39629  |
| C    | 2.39053  | -0.10221 | 0.03647  |
| C    | 2.52804  | -1.44216 | -0.37641 |
| C    | 1.48405  | -2.13885 | -1.06678 |
| H    | 0.56889  | -1.61587 | -1.30700 |
| C    | 1.63178  | -3.43648 | -1.44670 |
| H    | 0.82780  | -3.94012 | -1.96904 |
| C    | 2.83484  | -4.14530 | -1.16989 |
| H    | 2.92986  | -5.17836 | -1.48009 |

|   |          |          |          |
|---|----------|----------|----------|
| C | 3.85417  | -3.52292 | -0.52377 |
| H | 4.77875  | -4.04545 | -0.30647 |
| C | 3.73807  | -2.15976 | -0.11129 |
| C | 4.78360  | -1.52025 | 0.54682  |
| H | 5.69925  | -2.06497 | 0.75083  |
| C | 4.67659  | -0.19248 | 0.94076  |
| C | 5.76703  | 0.45864  | 1.59793  |
| H | 6.66463  | -0.11899 | 1.78701  |
| C | 5.68368  | 1.76088  | 1.96894  |
| H | 6.51502  | 2.24700  | 2.46380  |
| C | 4.49491  | 2.49759  | 1.70107  |
| H | 4.44039  | 3.53965  | 1.99081  |
| C | 3.43229  | 1.91224  | 1.08781  |
| H | 2.55094  | 2.50676  | 0.89655  |
| C | 3.46537  | 0.53658  | 0.68108  |
| N | 0.90652  | 0.92699  | -1.64365 |
| O | -3.25562 | -0.46571 | -1.59281 |
| O | -1.80531 | -0.94671 | 0.28704  |
| B | -2.86730 | -0.01774 | -0.25868 |
| H | -3.92067 | -1.15942 | -1.43701 |
| H | -1.58936 | -1.55784 | -0.42390 |
| O | -4.02393 | -0.06739 | 0.68467  |
| O | -5.00823 | -2.19284 | -0.24154 |
| P | -4.76975 | -1.42774 | 1.03507  |
| O | -5.92900 | -1.17512 | 1.93496  |
| O | -3.63033 | -2.20151 | 1.90543  |
| H | -2.78024 | -1.95787 | 1.48758  |

**Complex 1-SO<sub>4</sub><sup>2-</sup> (H):**

| Atom | X        | Y        | Z        |
|------|----------|----------|----------|
| C    | -1.72909 | 2.33831  | 0.41815  |
| C    | -0.61677 | 2.36392  | 1.27316  |
| C    | 0.20580  | 3.49346  | 1.31278  |
| H    | 1.05468  | 3.49709  | 1.98885  |
| C    | -0.03488 | 4.59192  | 0.50467  |
| H    | 0.62018  | 5.45398  | 0.54685  |
| C    | -1.12975 | 4.57945  | -0.35340 |
| H    | -1.33442 | 5.43143  | -0.99074 |
| C    | -1.96284 | 3.47200  | -0.37665 |
| H    | -2.82585 | 3.47108  | -1.03233 |
| C    | -0.24702 | 1.22773  | 2.20150  |
| H    | -0.13413 | 1.63481  | 3.20952  |
| H    | -1.04104 | 0.47400  | 2.22954  |
| C    | 1.52128  | -0.19856 | 2.94757  |
| H    | 0.82193  | -1.01351 | 3.19461  |
| H    | 1.65128  | 0.42179  | 3.83533  |
| H    | 2.48585  | -0.64151 | 2.69712  |
| C    | 0.92213  | -0.16664 | 0.61554  |
| H    | 0.38532  | 0.43678  | -0.11714 |



|   |          |          |          |
|---|----------|----------|----------|
| H | 0.28865  | -1.04290 | 0.78237  |
| C | 2.26731  | -0.55799 | 0.04679  |
| C | 3.02782  | 0.41690  | -0.62879 |
| C | 2.57340  | 1.76533  | -0.79154 |
| H | 1.61882  | 2.05790  | -0.37827 |
| C | 3.32352  | 2.69075  | -1.44785 |
| H | 2.95442  | 3.70362  | -1.55529 |
| C | 4.59047  | 2.34678  | -1.99808 |
| H | 5.17073  | 3.09923  | -2.51729 |
| C | 5.06084  | 1.07935  | -1.87108 |
| H | 6.02160  | 0.79657  | -2.28585 |
| C | 4.30286  | 0.07940  | -1.18706 |
| C | 4.78529  | -1.21850 | -1.05907 |
| H | 5.74980  | -1.47427 | -1.48460 |
| C | 4.05340  | -2.19277 | -0.39176 |
| C | 4.56794  | -3.52013 | -0.25829 |
| H | 5.53247  | -3.73829 | -0.70232 |
| C | 3.87249  | -4.47654 | 0.40663  |
| H | 4.26934  | -5.47914 | 0.50462  |
| C | 2.61058  | -4.15911 | 0.98423  |
| H | 2.06460  | -4.92606 | 1.51953  |
| C | 2.08422  | -2.91057 | 0.87365  |
| H | 1.12694  | -2.70900 | 1.33142  |
| C | 2.77514  | -1.86448 | 0.17613  |
| N | 1.04190  | 0.62236  | 1.84692  |
| O | -2.33158 | -0.14971 | 0.40353  |
| O | -4.02606 | 1.47747  | -0.09398 |
| B | -2.75983 | 1.12709  | 0.24944  |
| H | -3.03029 | -0.86826 | 0.24997  |
| H | -4.67251 | 0.71338  | -0.23588 |
| O | -4.90217 | -1.84490 | -2.18333 |
| O | -5.75848 | -0.40782 | -0.42771 |
| S | -5.26594 | -1.78332 | -0.76009 |
| O | -4.05030 | -2.03706 | 0.07984  |
| O | -6.30170 | -2.76769 | -0.42679 |

**Complex 1-SO<sub>4</sub><sup>2-</sup> (B):**

| Atom | X        | Y       | Z        |
|------|----------|---------|----------|
| C    | -2.29409 | 1.56806 | -0.23813 |
| C    | -1.29097 | 2.06096 | -1.09738 |
| C    | -1.02710 | 3.43203 | -1.16232 |
| H    | -0.29864 | 3.80185 | -1.87519 |
| C    | -1.69588 | 4.33663 | -0.34728 |
| H    | -1.47652 | 5.39593 | -0.41129 |
| C    | -2.65362 | 3.86391 | 0.53924  |
| H    | -3.18413 | 4.55308 | 1.18686  |
| C    | -2.94732 | 2.50451 | 0.57261  |
| H    | -3.72305 | 2.15168 | 1.24256  |
| C    | -0.47100 | 1.11943 | -1.96362 |

|   |          |          |          |
|---|----------|----------|----------|
| H | -0.93352 | 0.13375  | -1.93584 |
| H | -0.47874 | 1.46655  | -3.00054 |
| C | 1.81101  | 2.05274  | -1.98145 |
| H | 1.68435  | 2.95823  | -1.37003 |
| H | 1.62572  | 2.31168  | -3.02522 |
| H | 2.85455  | 1.74139  | -1.88991 |
| C | 1.11361  | 0.62439  | -0.17132 |
| H | 0.27000  | 0.00189  | 0.12779  |
| H | 1.06304  | 1.52301  | 0.45436  |
| C | 2.40518  | -0.12612 | 0.06907  |
| C | 2.46446  | -1.48479 | -0.30121 |
| C | 1.34283  | -2.16825 | -0.87524 |
| H | 0.40735  | -1.64027 | -1.01018 |
| C | 1.42645  | -3.47905 | -1.23045 |
| H | 0.56442  | -3.97634 | -1.65816 |
| C | 2.63136  | -4.21369 | -1.04316 |
| H | 2.67347  | -5.25563 | -1.33513 |
| C | 3.71582  | -3.60796 | -0.49466 |
| H | 4.63995  | -4.15256 | -0.33790 |
| C | 3.66973  | -2.23326 | -0.10731 |
| C | 4.77947  | -1.61265 | 0.45775  |
| H | 5.69104  | -2.18136 | 0.60769  |
| C | 4.74075  | -0.27469 | 0.82903  |
| C | 5.89146  | 0.35355  | 1.40046  |
| H | 6.78073  | -0.24920 | 1.54531  |
| C | 5.87324  | 1.66498  | 1.74754  |
| H | 6.74930  | 2.13293  | 2.17876  |
| C | 4.69357  | 2.43507  | 1.53965  |
| H | 4.68996  | 3.48342  | 1.81128  |
| C | 3.57699  | 1.87318  | 1.00559  |
| H | 2.70391  | 2.49185  | 0.85819  |
| C | 3.53988  | 0.48907  | 0.62876  |
| N | 0.94179  | 0.96052  | -1.58523 |
| O | -3.33606 | -0.29137 | -1.59069 |
| O | -1.70490 | -0.89905 | 0.13818  |
| B | -2.78724 | 0.00069  | -0.26410 |
| H | -4.11476 | -0.85281 | -1.48324 |
| H | -2.11811 | -1.69749 | 0.49406  |
| O | -3.92124 | -0.11903 | 0.77842  |
| O | -5.46805 | -1.66158 | -0.28044 |
| S | -4.74097 | -1.42718 | 0.97173  |
| O | -5.62365 | -1.16682 | 2.09472  |
| O | -3.77689 | -2.49992 | 1.23958  |

**Complex 1-HOx<sup>-</sup> (7<sup>o</sup>):**

| Atom | X        | Y       | Z        |
|------|----------|---------|----------|
| C    | -3.11112 | 0.86731 | -0.26905 |
| C    | -2.22138 | 1.51019 | -1.15333 |

|   |          |          |          |
|---|----------|----------|----------|
| C | -2.21771 | 2.90440  | -1.24386 |
| H | -1.57768 | 3.38831  | -1.97178 |
| C | -3.03437 | 3.68427  | -0.43662 |
| H | -3.01405 | 4.76392  | -0.52409 |
| C | -3.88064 | 3.06618  | 0.47267  |
| H | -4.52210 | 3.65962  | 1.11343  |
| C | -3.92001 | 1.67887  | 0.53616  |
| H | -4.61146 | 1.20837  | 1.22509  |
| C | -1.24164 | 0.72758  | -2.01467 |
| H | -1.49170 | -0.33306 | -1.97200 |
| H | -1.33589 | 1.04592  | -3.05598 |
| C | 0.80275  | 2.10606  | -2.05465 |
| H | 0.51841  | 2.95768  | -1.42042 |
| H | 0.53934  | 2.33923  | -3.08737 |
| H | 1.88874  | 2.00302  | -1.99599 |
| C | 0.44524  | 0.54070  | -0.25875 |
| H | -0.20354 | -0.28549 | 0.02825  |
| H | 0.17345  | 1.37761  | 0.39415  |
| C | 1.88415  | 0.12947  | -0.03803 |
| C | 2.28463  | -1.15098 | -0.46773 |
| C | 1.38277  | -2.05968 | -1.11134 |
| H | 0.35762  | -1.76095 | -1.28312 |
| C | 1.79236  | -3.29308 | -1.51290 |
| H | 1.09095  | -3.96282 | -1.99505 |
| C | 3.13445  | -3.72059 | -1.30767 |
| H | 3.43744  | -4.70698 | -1.63586 |
| C | 4.02368  | -2.89246 | -0.70192 |
| H | 5.04936  | -3.20104 | -0.53534 |
| C | 3.63278  | -1.58907 | -0.26604 |
| C | 4.54406  | -0.74047 | 0.35422  |
| H | 5.56437  | -1.07465 | 0.50906  |
| C | 4.17066  | 0.53016  | 0.77320  |
| C | 5.12168  | 1.39749  | 1.39606  |
| H | 6.13020  | 1.02698  | 1.53984  |
| C | 4.77441  | 2.64803  | 1.79112  |
| H | 5.50100  | 3.29937  | 2.26034  |
| C | 3.44432  | 3.11152  | 1.58274  |
| H | 3.17796  | 4.11461  | 1.89212  |
| C | 2.50876  | 2.31495  | 1.00131  |
| H | 1.51232  | 2.70541  | 0.85493  |
| C | 2.82131  | 0.98186  | 0.57276  |
| N | 0.17738  | 0.85626  | -1.66091 |
| O | -3.86509 | -1.25451 | -1.48851 |
| B | -3.34769 | -0.73972 | -0.26220 |
| H | -4.12171 | -0.55290 | -2.09102 |
| O | -4.26653 | -1.12452 | 0.89852  |
| O | -4.12424 | -2.34129 | 2.77693  |
| C | -3.66515 | -1.89326 | 1.75833  |
| C | -2.23210 | -2.15268 | 1.24460  |
| O | -2.09719 | -1.53273 | 0.10627  |
| O | -1.40066 | -2.81545 | 1.80785  |
